# Supplementary material for: Combination Therapy with STAT3 Inhibitor Enhances SERCA2a-Induced BMPR2 Expression and Inhibits Pulmonary Arterial Hypertension
Source: MDPI journal article supplement (doi:10.3390/ijms22179105), 2021-08-24
Supplement: s1 [file s1]

## SUPPLEMENTARY MATERIAL

**Supplementary Figure S1. Gene Set Enrichment Analysis of RNA-Seq datasets in hPASC co-overexpressing SERCA2a and BMPR2.** Gene Set Enrichment Analysis (GSEA) reveals significant regulation of endoplasmic unfolded protein response and epithelial-mesenchymal transition gene sets.

**Supplementary Figure S2. Histological analysis of lung tissue in the severe model of PAH induced unilateral left pneumonectomy combined with a "second hit" of MCT.** Using the left pneumonectomy combined with a "second hit" of MCT (PNT/MCT) model, hematoxylin and Eosin in lung tissue show focal pulmonary arteritis and inflammation, concentric medial thickening of the vessel walls, and concentric intimal thickening of vessel walls, resulting in severely constricted vessels. The pneumonectomy combined with MCT model creates a clinically relevant model as revealed by the presence of complex lesions (Grade 2-4).

**Supplementary Figure S3. Cardiac magnetic resonance imaging shows significant RV dysfunction and remodeling.** Cardiac MRI was performed at baseline and three weeks post-pneumonectomy to confirm PAH severity in PNT/MCT-PAH rats. **A-C.** MRI images were acquired in the short and long axis to determine hemodynamic parameters, including right ventricular ejection fraction (RVEF), right ventricular end-systolic volume (RVESV), and mean pulmonary arterial pressure (mPAP). **D-F.** Long-axis images are shown at baseline, 3 weeks post-pneumonectomy, and 6 weeks post-pneumonectomy in PNT/MCT model of PAH in rats.

**Supplementary Figure S4. Monotherapies and combination therapies significantly downregulate IL-6 transcript levels in the PNT/MCT-induced PAH model.** IL6 mRNA expression was assessed by RT-qPCR in lung samples from control rats and PNT-MCT-induced PAH rats treated with either AAV1.Luciferase as control (AAV1.LUC), AAV1.hSERCA2a, AAV1.BMPR2, STAT3 inhibitor (STAT3i) alone, or in combination as follow: AAV1.SERCA2a/BMPR2 or AAV1.SERCA2a/STAT3i.

**Supplementary Figure S1**

**A**

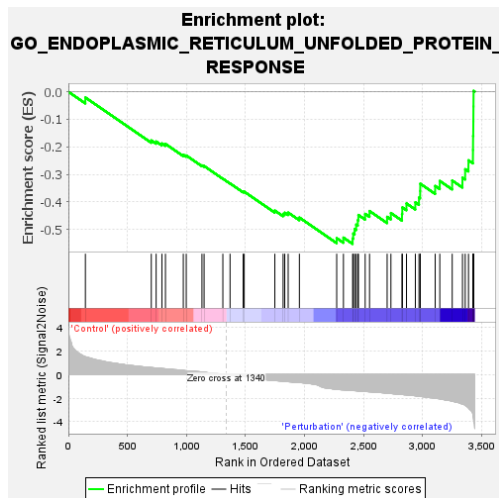

**B**

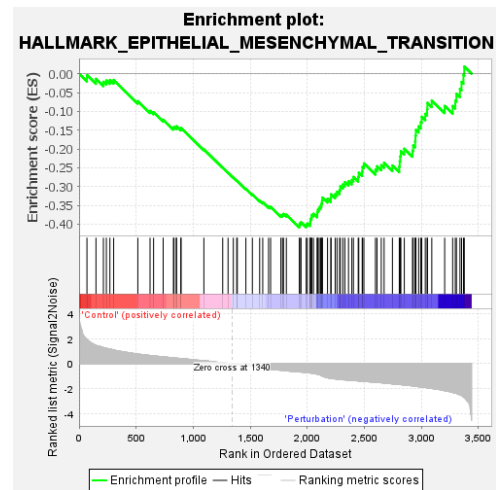

## Supplementary Figure S2

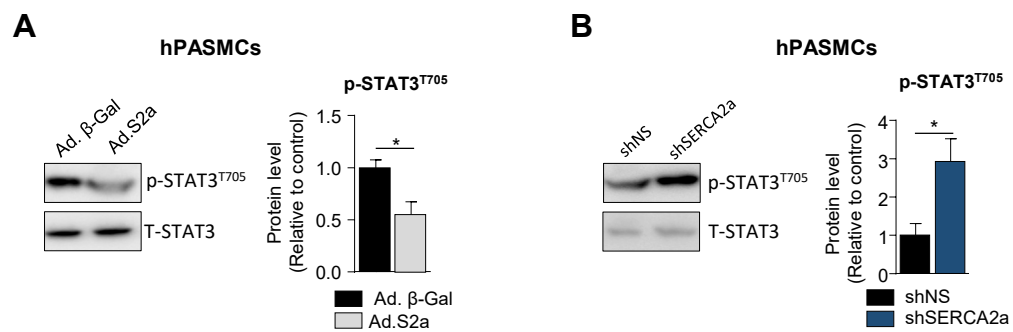

# Supplementary Figure S3

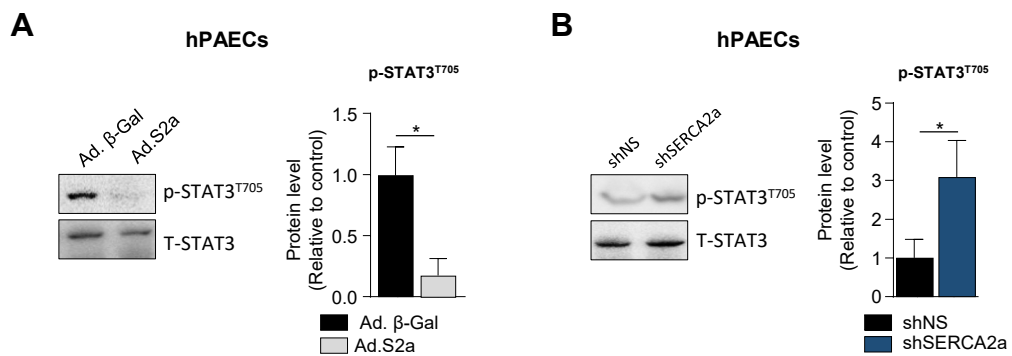

## Supplementary Figure S4

### PNT/MCT-induced PAH model: Grade 2-4 lesions

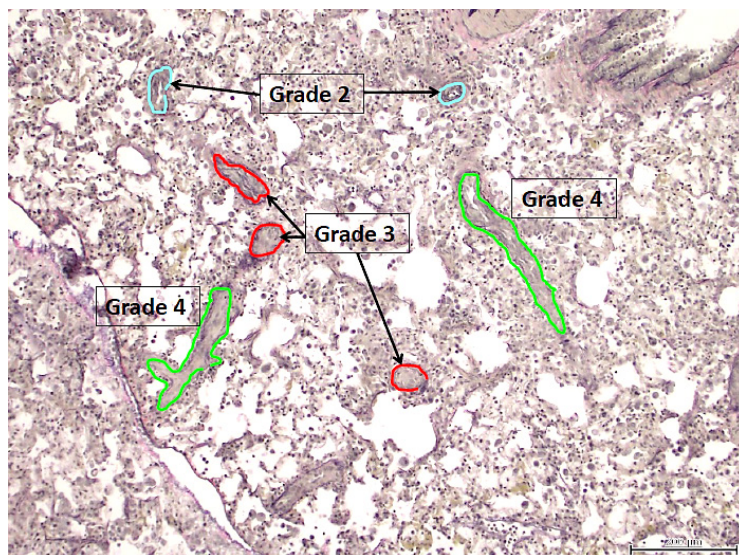

**Supplementary Figure S5**

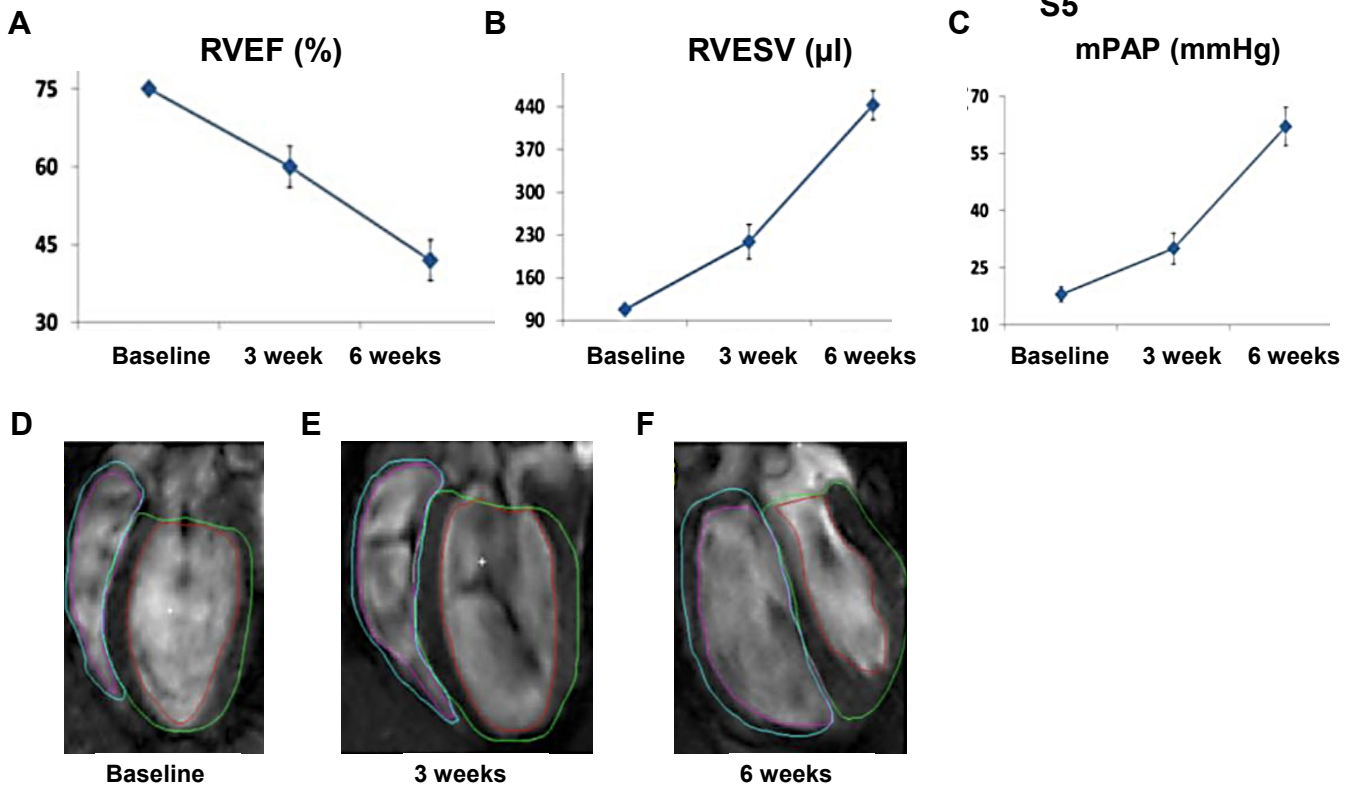

**Supplementary Figure S6**

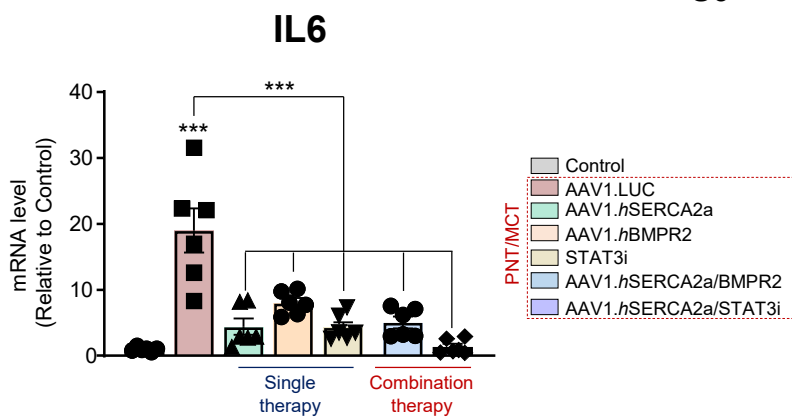

**Supplementary Table S1. Idiopathic PAH patients pulmonary hemodynamics pre-lung transplant**

|           | Gender | Diagnosis | Age | Pre-LTx TPR<br>(Wood units) | Pre-LTx<br>mPAP<br>(mmHg) | Pre-LTx CI<br>(l/min/m <sup>2</sup> ) |
|-----------|--------|-----------|-----|-----------------------------|---------------------------|---------------------------------------|
| Patient 1 | Woman  | IPAH      | 31  | 14.5                        | 69                        | 2.45                                  |
| Patient 2 | Man    | IPAH      | 49  | 13                          | 43                        | 3.23                                  |
| Patient 3 | Woman  | IPAH      | 59  | 9.4                         | 53                        | 2.85                                  |
| Patient 4 | Woman  | IPAH      | 31  | 14                          | 61                        | 1.6                                   |
| Patient 5 | Woman  | IPAH      | 18  | 26.4                        | 100                       | 1.7                                   |

**Supplementary Table S2. Hereditary PAH patients pulmonary hemodynamics pre-lung transplant**

|           | Gender | Diagnosis | Age | Genetic<br>Status | Mutation |                        | Pre-LTx<br>TPR<br>(Wood<br>units) | Pre-LTx<br>mPAP<br>(mmHg) | Pre-LTx<br>CI<br>(l/min/m <sup>2</sup> ) |
|-----------|--------|-----------|-----|-------------------|----------|------------------------|-----------------------------------|---------------------------|------------------------------------------|
| Patient 1 | Woman  | HPAH      | 22  | BMPR2             | Exon 7   | Substitution<br>901T>C | 29.3                              | 99                        | 1.71                                     |
| Patient 2 | Woman  | HPAH      | 35  | BMPR2             | Exon 12  | Framshift<br>2522dupCA | 11                                | 64                        | 3.25                                     |
| Patient 3 | Woman  | HPAH      | 21  | BMPR2             | Exon 3   | Deletion<br>Exon 3     | 13.7                              | 55                        | 2.46                                     |
| Patient 4 | Woman  | HPAH      | 26  | BMPR2             | Exon 10  | Deletion<br>Exon 10    | 6.4                               | 41                        | 4.29                                     |
| Patient 5 | Woman  | HPAH      | 30  | BMPR2             | Exon 3   | Substitution<br>280T>G | 14.1                              | 53                        | 2.15                                     |

**Supplementary Table S3. Non-PAH control patient diagnosis at the time of surgery**

|           | Gender | Diagnosis               |
|-----------|--------|-------------------------|
| Patient 1 | Man    | Squamous cell carcinoma |
| Patient 2 | Man    | Adenocarcinoma          |
| Patient 3 | Man    | Adenocarcinoma          |
| Patient 4 | Man    | Squamous cell carcinoma |



**Supplementary Table S4. Reagents.** Primer sequences for RT-qPCR analysis; clone ID; catalog numbers for shRNAs and siRNA (Open Biosystems); antibodies; source and concentration of chemical inhibitors.

| Application            | Gene symbol               | Species                            | Forward primer (5'-3')    | Reverse primer (5'-3')   |
|------------------------|---------------------------|------------------------------------|---------------------------|--------------------------|
| RT-qPCR                | BMPR2                     | Human                              | ATCCAGATTATTCTTCCTCCTC    | TCACGATGCTGTCAGTATG      |
|                        |                           | Rat                                | CTTTGCCCTCCTGCTTCTTGG     | CCAAGGTCTTGTTGATACGGGTC  |
|                        | SERCA2a                   | Human                              | AGACCCAAGCTGGCTAGCGTTTA   | TTCTTCAGCCGGTAACTCGTTGGA |
|                        |                           | Rat                                | TATGCTGCCAAGACGGTGTT      | ACTGGATCAGAGGGCTGGAT     |
|                        | ANP                       | Rat                                | CCCGACCCACGCCAGCATGG      | CAACTGCTTTCTGAAAGGGGT    |
|                        | BNP                       | Rat                                | ACAATCCACGATGCAGAAGCT     | GGGCCTTGGTCCTTTGAGA      |
|                        | β-MHC                     | Rat                                | ACAGAGGAAGACAGGAAGAACCTAC | CACAAGATCTACTCCTCATTGAG  |
|                        | COL1A1                    | Rat                                | AATGGTGCTCCTGGTATTGC      | GGTTCACCACTGTTGCCTTT     |
|                        | COL3A1                    | Rat                                | GAGATGTCTGGAAGCCAGAACCATG | ATCTCCCTTGGGGCCTTGAGGT   |
|                        | CTGF                      | Rat                                | CCCGTTAGCCTCGCCTTGG       | GGTACACGGACCCACCGAA      |
|                        | STAT3                     | Human                              | CTGTGGGAAGAATCACGCCT      | ACATCCTGAAGGTGCTGCTC     |
|                        | IL6                       | Rat                                | TCCTACCCCAACTTCCAATGCTC   | TTGGATGGTCTTGGTCCTTAGCC  |
|                        | GAPDH                     | Human                              | CGACCACTTTGTCAAGCTCA      | AGGGGAGATTCAGTGTGGTG     |
|                        |                           | Rat                                | TGACAACTCCCTCAAGATTGTCA   | GGCATGGACTGTGGTCATGA     |
|                        |                           |                                    |                           |                          |
| shRNAs                 | Gene symbol               | Clone ID                           |                           | Catalog number           |
|                        | ATP2a2                    | TRCN0000038529                     |                           | RHS3979-201767396        |
|                        |                           |                                    |                           |                          |
| siRNA                  | Gene symbol               | siRNA ID                           |                           | Catalog number           |
|                        | STAT3                     | 116558                             |                           | AM16708                  |
|                        |                           |                                    |                           |                          |
| Immunoblotting         | Protein symbol            | Antibody source                    |                           | Dilution                 |
|                        | BMPR2                     | Cell signaling                     |                           | 1:1000                   |
|                        | Cyclin D1                 | BD Pharmingen                      |                           | 1:1000                   |
|                        | p-SMAD 1-5-9              | Cell signaling                     |                           | 1:1000                   |
|                        | T-SMAD 1                  | Cell signaling                     |                           | 1:1000                   |
|                        | p-STAT3 <sup>T705</sup>   | Cell signaling                     |                           | 1:1000                   |
|                        | T-STAT3                   | Cell signaling                     |                           | 1:2000                   |
|                        | SERCA2a                   | 21st Century Biochemicals, MA, USA |                           | 1:2500                   |
|                        | GAPDH                     | Sigma Aldrich                      |                           | 1:5000                   |
|                        |                           |                                    |                           |                          |
|                        | Compounds                 | Concentration                      |                           | Source                   |
| Pharmacological agents | HJC0152 (STAT3 inhibitor) | 1 umol                             |                           | MedChem Express          |
